# Supplementary material for: Flux synthesis of regular Bi4TaO8Cl square nanoplates exhibiting dominant exposure surfaces of {001} crystal facets for photocatalytic reduction of CO2 to methane
Source: Royal Society of Chemistry journal article supplement (doi:10.1039/c7nr06279f), 2017-12-19
Supplement: c7nr06279f1.pdf [file c7nr06279f1.pdf]

## Supporting information

# **Flux Synthesis of Regular Bi<sub>4</sub>TaO<sub>8</sub>Cl Square Nanoplates Exhibiting Dominant Exposure Surfaces of {001} Crystal Facets for Photocatalytic Reduction of CO<sub>2</sub> into Methane**

*Liang Li,<sup>b,c</sup> Qiutong Han,<sup>b,c</sup> Lanqin Tang,<sup>b,c,d</sup> Yuan Zhang,<sup>b,c</sup> Ping Li,<sup>b,c</sup> and*

*Yong Zhou,<sup>a,b,c,e\*</sup> Zhigang Zou<sup>b,c</sup>*

<sup>a</sup> Key Laboratory of Modern Acoustics (MOE), Institute of Acoustics, Department of Physics, Nanjing University, Nanjing 210093, P. R. China.

E-mail: zhouyong1999@nju.edu.cn

<sup>b</sup> School of Physics, National Laboratory of Solid State Microstructures, Collaborative Innovation Center of Advanced Microstructures, Nanjing University, Nanjing 210093, P. R. China

<sup>c</sup> Eco-Materials and Renewable Energy Research Center (ERERC), Nanjing University, Nanjing, 210093, P. R. China

<sup>d</sup> College of Chemistry and Chemical Engineering, Yancheng Institute of Technology, Yancheng 22401, P. R. China

<sup>e</sup> kunshan Sunlaite New Energy Co. Ltd., Kunshan Innovation Institute of Nanjing University, Kunshan, Jiangsu 215347, P. R. China

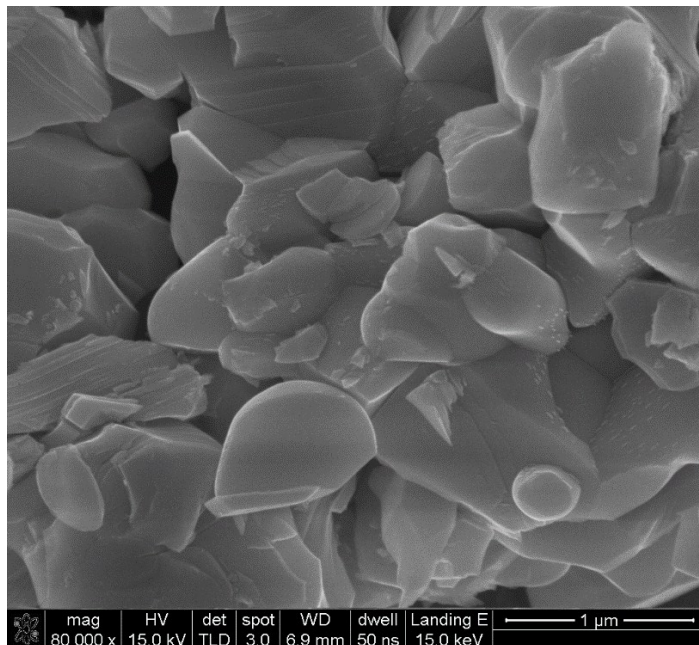

**Figure S1.** Typical SEM image of Bi<sub>4</sub>TaO<sub>8</sub>Cl-SSR.

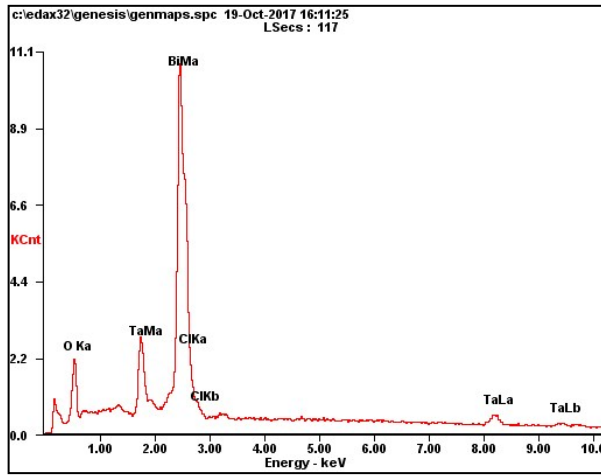

| <i>Element</i> | <i>Wt%</i> | <i>At%</i> |
|----------------|------------|------------|
| <i>OK</i>      | 13.45      | 62.24      |
| <i>BiM</i>     | 68.86      | 24.40      |
| <i>ClK</i>     | 03.66      | 07.62      |
| <i>TaL</i>     | 14.03      | 05.74      |
| <i>Matrix</i>  | Correction | ZAF        |

**Figure S2.** EDS spectrum of the sample  $\text{Bi}_4\text{TaO}_8\text{Cl}$ -750 and its corresponding atomic ratio between O, Bi, Cl and Ta.

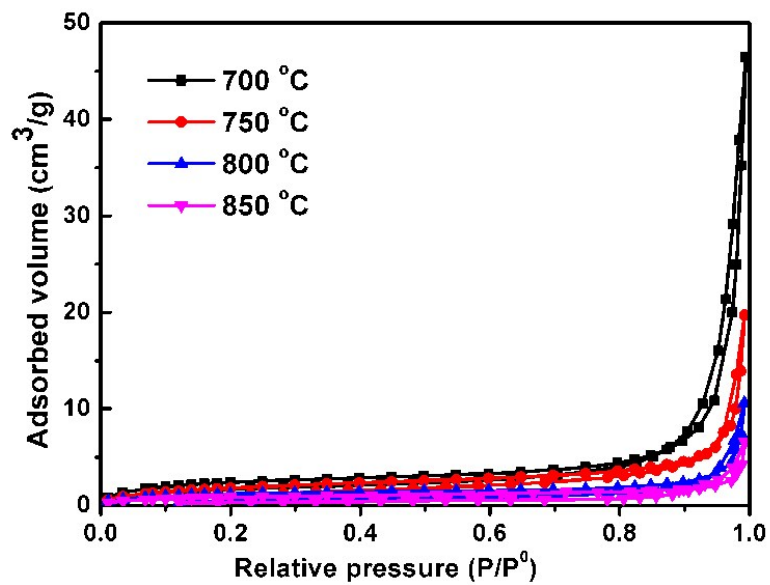

**Figure S3.** Typical N<sub>2</sub> adsorption plots of as-prepared samples.

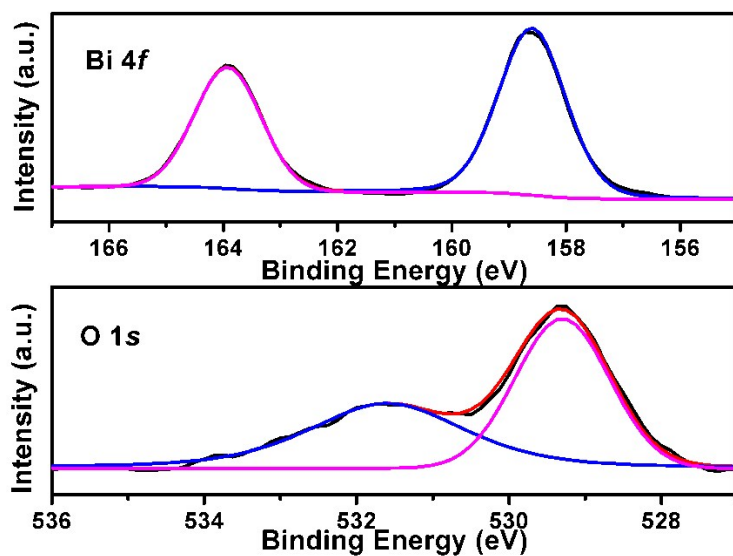

**Figure S4.** X-ray photoelectron spectrum of Bi 4f and O 1s. Two symmetric peaks of the sample appears at ca. 158.8 eV for Bi 4f<sub>5/2</sub> and ca. 164.0 eV for Bi 4f<sub>7/2</sub>. For O 1s, two peaks at 529.3 eV and 531.7 eV are observed, which are assigned to lattice oxygen and bridging hydroxyls, respectively. The XPS peaks of Ta element were not shown here because XPS peaks of Ta 4f<sub>5/2</sub> (locates at 23.5 eV) and Bi 5d<sub>5/2</sub> (locates at 23.5 eV) overlap together, and it is difficult to detect Ta when Bi exists.

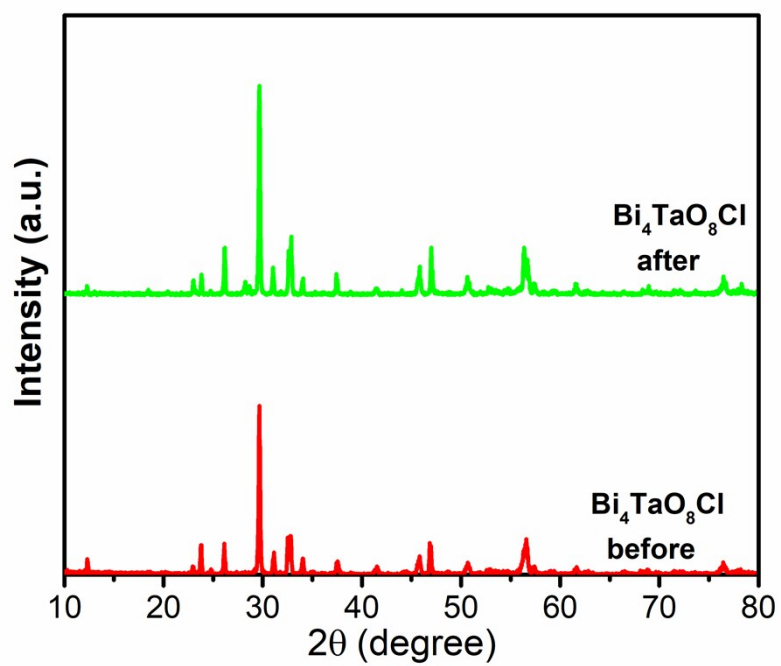

**Figure S5.** XRD pattern of  $\text{Bi}_4\text{TaO}_8\text{Cl}$ -750 before and after the photocatalytic experiment.

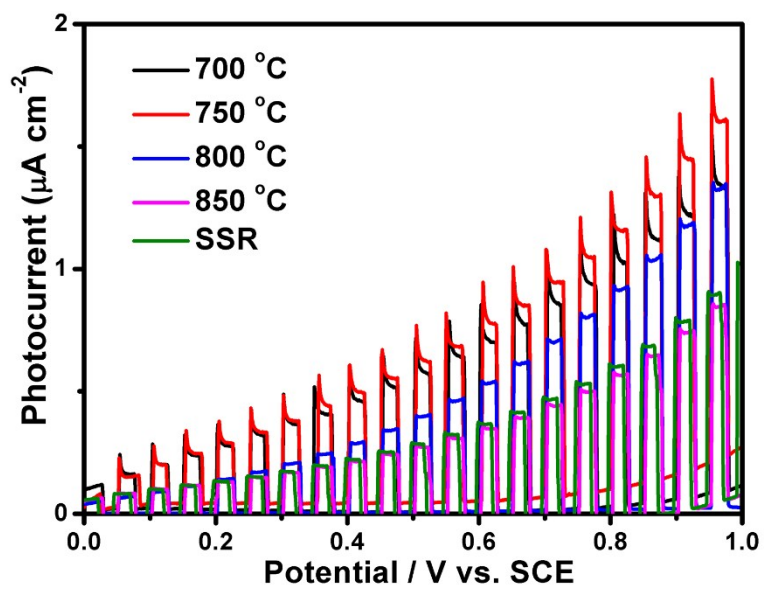

**Figure S6.** Transient photocurrent of as-prepared samples under visible light illumination ( $\lambda > 420$  nm).

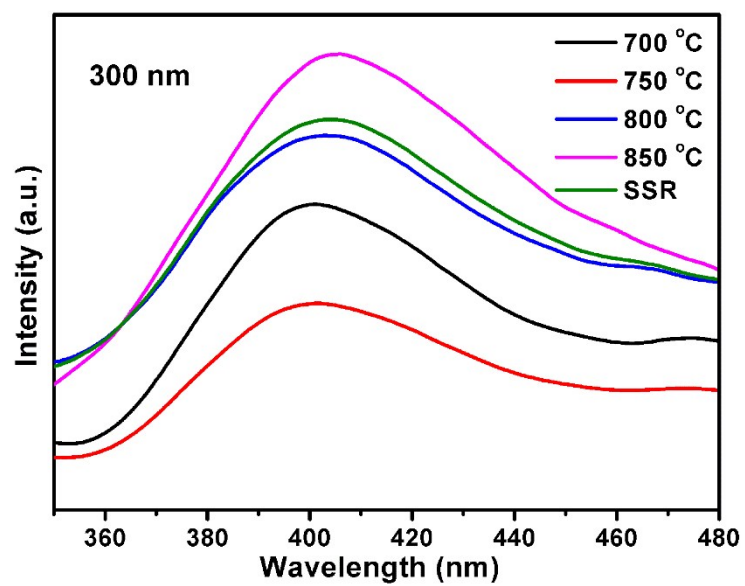

Figure S7. PL spectra the  $\text{Bi}_4\text{TaO}_8\text{Cl}$  sample with an excitation at 300 nm.
